# Supplementary material
Source: MDPI journal article supplement (https://www.mdpi.com/2073-4352/8/5/189)
Supplement: s1 [file s1]

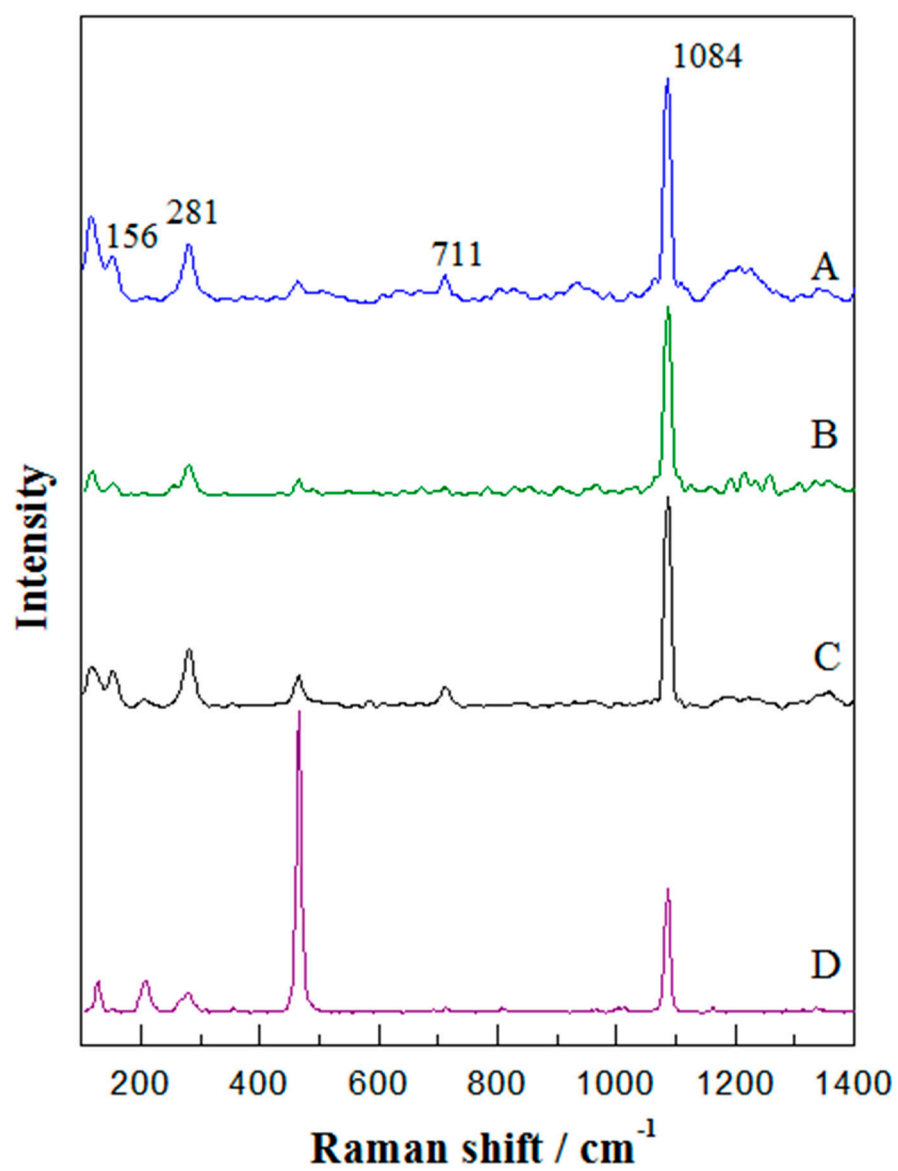

**Supplementary 1:** The Raman analysis of upper (A) and bottom (B) sections for monoculture, and upper (C) and bottom (D) sections for coculture.

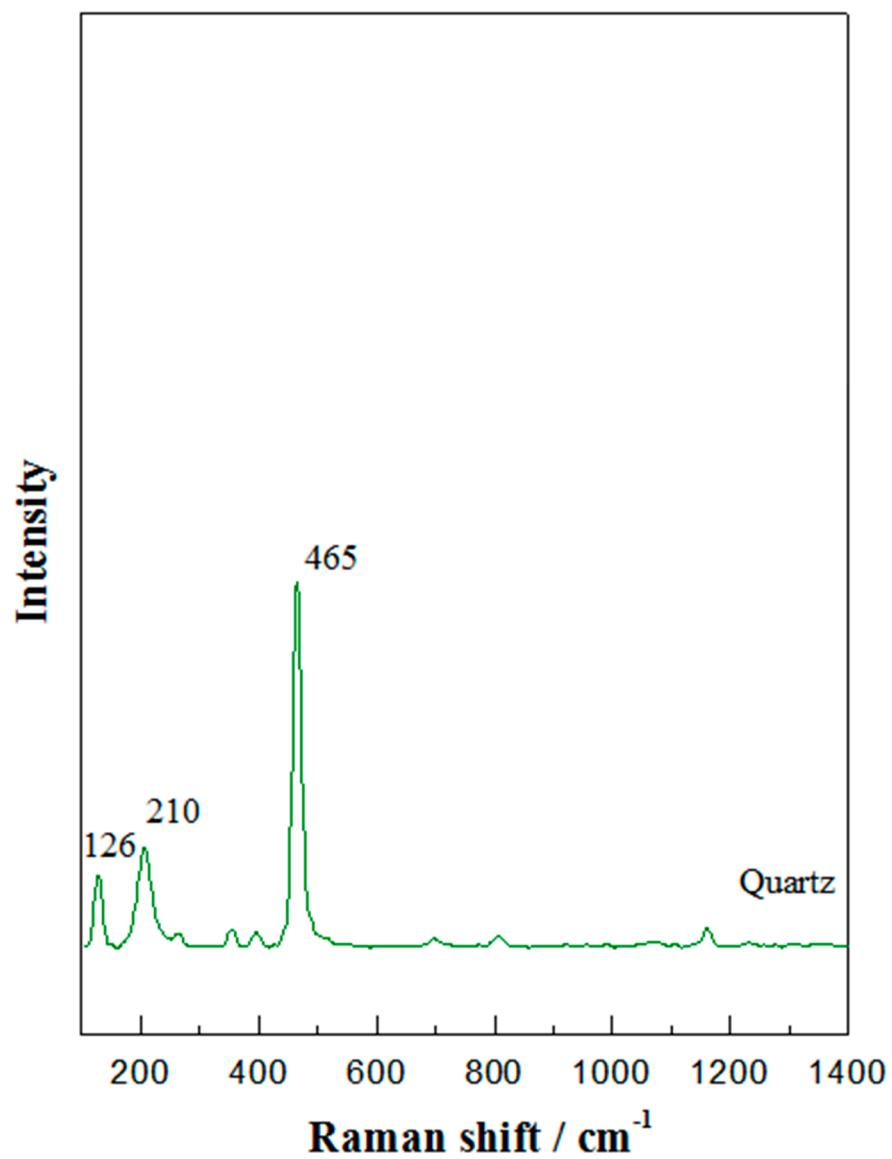

**Supplementary 2:** The Raman analysis of quartz only
